# Supplementary material
Source: publisher figshare collection journal article supplement (https://tandf.figshare.com/ndownloader/files/16913408)
Supplement: Supplementary file 1 [file 16913408]

**Table S1** Patients’ characteristics according to their ‘pregnant’ or ‘non pregnant’ status after a single ICSI cycle

|  | | **Pregnant (n=17)** | **Non pregnant (n=15)** | **P value** |
| --- | --- | --- | --- | --- |
| **Quantitative features** | |  |  |  |
| **Age**  median in years (P25-P75) | | 34 (30-35) | 33 (31-34) | 0.95 |
| **Rank of IVF attempt**  median (P25-P75) | | 1 (1-2) | 1 (1-2) | 0.56 |
| **Serum E2 level**  median in pg/ml (P25-P75) | | 1734 (1430-2465) | 1449 (1226-1878) | 0.21 |
| **Number of oocytes**  mean (±SD) | | 15 (±6) | 11 (±5) | 0.045 |
| **Qualitative features, n (%)** | |  |  |  |
| **Etiologies of infertility** | male | 10 (58.8) | 8 (53.3) | 0.75 |
| homosexual | 4 (23.5) | 5 (33.3) | 0.70 |
| PCOS | 4 (23.5) | 6 (40) | 0.45 |
| tubal | 2 (11.8) | 1 (6.7) | 0.99 |
| unknown | 2 (11.8) | 0 (0.0) | 0.49 |
| **Type of infertility** | primary | 13 (76.5) | 13 (86.7) | 0.66 |
| secondary | 4 (23.5) | 2 (13.3) | 0.66 |
| **Stimulation protocol** | antagonist | 14 (82.4) | 13 (86.7) | 0.99 |
| agonist | 3 (17.6) | 2 (13.3) | 0.99 |

Patient characteristics were compared according to the pregnant status (pregnant versus not pregnant) using Student t-test for normally distributed quantitative variables, Mann-Whitney test for skewed distributed quantitative variables and Chi-square test for qualitative variables.
